# Supplementary material
Source: PubMed Central journal article supplement (PMC3732929)
Supplement: 1306287110_pnas.201306287SI.pdf [file 1306287110_pnas.201306287SI.pdf]

# Supporting Information

Nitzan et al. 10.1073/pnas.1306287110

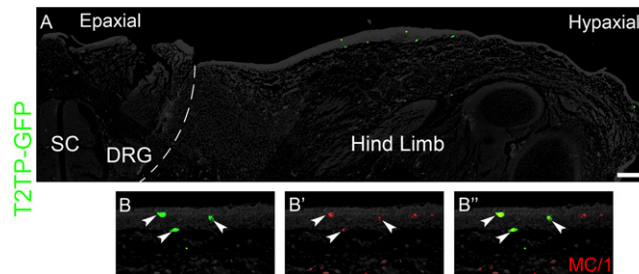

**Fig. S1.** Schwann cell progenitor (SCP)-derived melanocytes colonize the hypaxial domain. (A–B'') Transverse sections through the hindlimb region of the embryo presented in Fig. 2 F–I, showing restricted localization of GFP<sup>+</sup>/MC1<sup>+</sup> cells to the hypaxial limb domain with no crossing toward the epaxial region. Dotted line separates epaxial from hypaxial areas. (B–B'') High magnifications of a hypaxial region in A showing colocalization of the GFP lineage tracer with the melanocyte marker MC1 (arrowheads). Methods: ventral to dorsal coelectroporation of pCAGG-T2TP and pT2K-EGFP was performed at embryonic day (E)2 to label SCPs that reach and associate with spinal nerves. Sixteen hours later, embryos were inspected to ensure that no residual GFP<sup>+</sup> cells remained in the NT (i.e., that the prospective late-emigrating, neural crest (NC)-derived melanocytes are unlabeled). At E6–E7, the localization of GFP<sup>+</sup> nerve-derived melanocytes cells was monitored (details in Fig.2). DRG, dorsal root ganglion; SC, spinal cord. (Scale bar, 40 μm in A; 20 μm in B–B'').

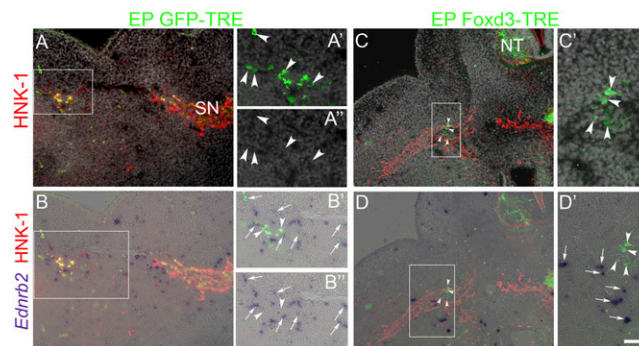

**Fig. S2.** Continuous expression of Foxd3 in SCP inhibits melanocyte development. (A–D) Transverse sections through E5.5 embryos electroporated at E2 (hindlimb level) with pCAGGS-rtTA2s-M2 together with either pBI-TRE-GFP (A–B'') or pBI-TRE-Foxd3 (C–D'). Doxycyclin was added 2 d later (see below for details and also legend to Fig. 3). In control embryos, GFP<sup>+</sup> cells are attached to the nerve, where they coexpress HNK-1 (A). Because HNK-1 is also expressed by the spinal nerve fibers, A' and A'' show GFP<sup>+</sup> staining surrounding Hoechst<sup>+</sup> nuclei [i.e., corresponding to nerve-associated SCPs (arrowheads)]. In addition, control GFP<sup>+</sup> cells are distributed in the dermis and in the vicinity of nerve fibers, where many coexpress *Ednr2* (arrows in B' and B''); arrowheads point to few GFP<sup>+</sup>/*Ednr2*- cells). In contrast, Foxd3<sup>+</sup> cells are absent from the dermis/epidermis. Instead they are only found in HNK-1-expressing SCPs associated with nerve fibers (arrowheads in C and C'), where they fail to up-regulate *Ednr2* (arrowheads in D and D'). Arrows in D' represent *Ednr2*<sup>+</sup> melanocytes that are negative for Foxd3-TRE. HL, hindlimb; NT, neural tube; SN, spinal nerve. In all panels, lateral is to the left. (Scale bar, 50 μm in A–D; 40 μm in B and B'; 30 μm in A', A'', and D'; 20 μm in C').
